# Supplementary material
Source: PubMed Central journal article supplement (PMC4300516)
Supplement: NIHMS60959-supplement-01.pdf [file NIHMS60959-supplement-01.pdf]

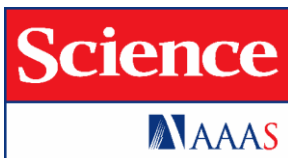

[www.sciencemag.org/content/346/6208/1253596/suppl/DC1](http://www.sciencemag.org/content/346/6208/1253596/suppl/DC1)

## Supplementary Materials for

### **Cdc48 and a ubiquitin ligase drive disassembly of the CMG helicase at the end of DNA replication**

Marija Maric, Timurs Maculins, Giacomo De Piccoli, Karim Labib\*

\*Corresponding author. E-mail: [kpmlabib@dundee.ac.uk](mailto:kpmlabib@dundee.ac.uk)

Published 24 October 2014, Science **346**, 1253596 (2014)  
DOI: 10.1126/science.1253596

**This PDF file includes:**

Supplementary Text  
Figs. S1 to S14  
Table S1  
Full Reference List

### **Supplementary Text: Author Contributions**

GDP made the initial discovery of ubiquitylated Mcm7. MM performed the experiments shown in Fig. 1, Fig. 2A, Fig. 3, Figs. 7-8, Fig. S1, Fig. S3, Fig. S4, and Figs. S10-S14. TM performed the experiments in Fig. 2B-D, Figs. 4-6, Fig. S2, and Figs. S5-S9. KL designed and interpreted all the experiments, in collaboration with MM, TM and GDP. KL wrote the manuscript together with MM and TM.

# Maric-Maculins Supplementary Figure 1

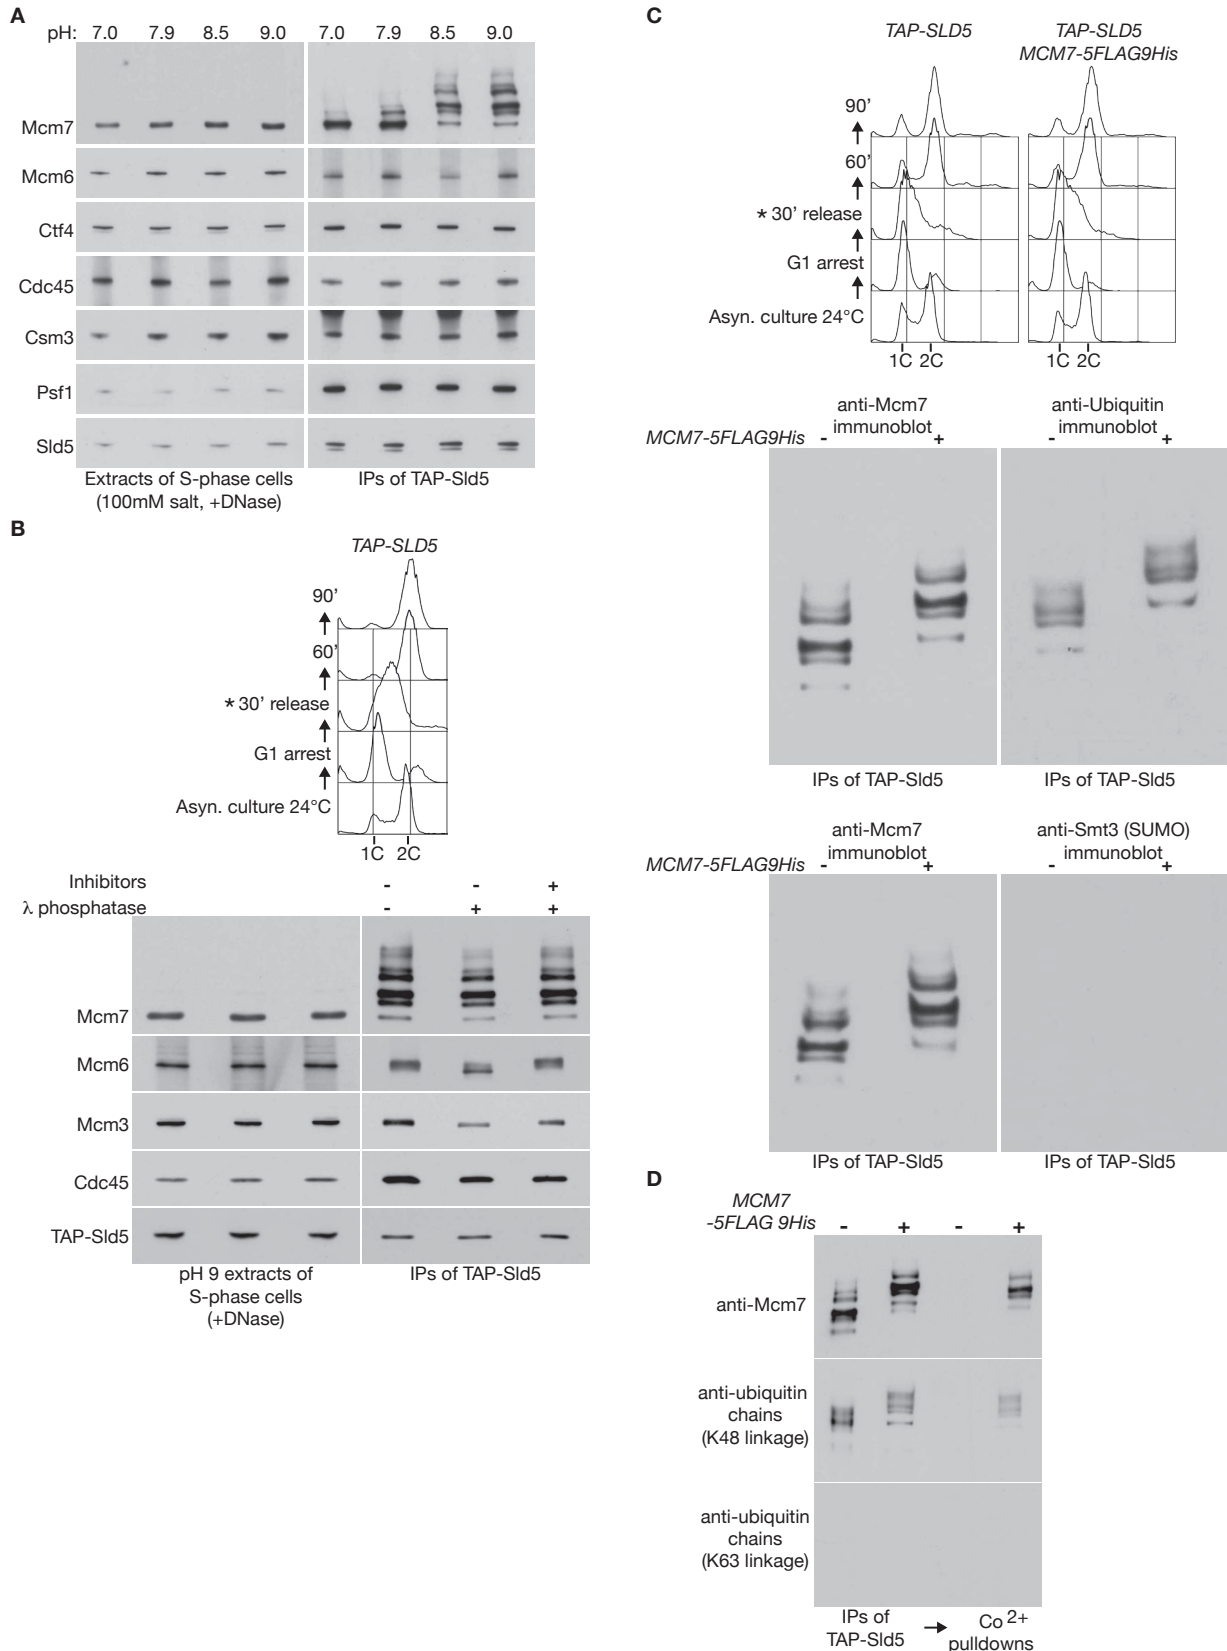

*In vitro* ubiquitylation of CMG helicase in yeast cell extracts.

(A) Extracts of S-phase *TAP-SLD5* cells (YASD375) were generated at the indicated pH, before digestion of chromosomal DNA and isolation of the GINS component of the CMG helicase, via a TAP tag on the Sld5 subunit. The indicated CMG components and the other replisome factors were detected by immunoblotting.

(B) Extracts of S-phase *TAP-SLD5* cells (YASD375) were prepared at pH 9 as above (DNA content was measured by flow cytometry; the asterisk denotes the sample that was used to prepare the cell extracts), before immunoprecipitation of the TAP-Sld5 subunit of GINS. As indicated, the immunoprecipitates were treated with λ phosphatase (with or without phosphatase inhibitors), as described in Methods.

(C) TAP-Sld5 was isolated from S-phase extracts of *TAP-SLD5* (YASD375) and *TAP-SLD5 MCM7-5FLAG9His* (YGDP483), before immunoblotting with antibodies specific to Mcm7, ubiquitin (P4D1) or Smt3 (SUMO). DNA content was measured by flow cytometry; the asterisk again denotes the samples that were used to prepare the cell extracts.

(D) A similar experiment was performed with control cells (YASD375) or cells with tagged Mcm7 (YGDP483).

The isolated proteins were analysed by immunoblotting with the indicated antibodies.

Additional flow cytometry data for the experiments in this Fig. can be found in Fig. S14.

## Maric-Maculins Supplementary Figure 2

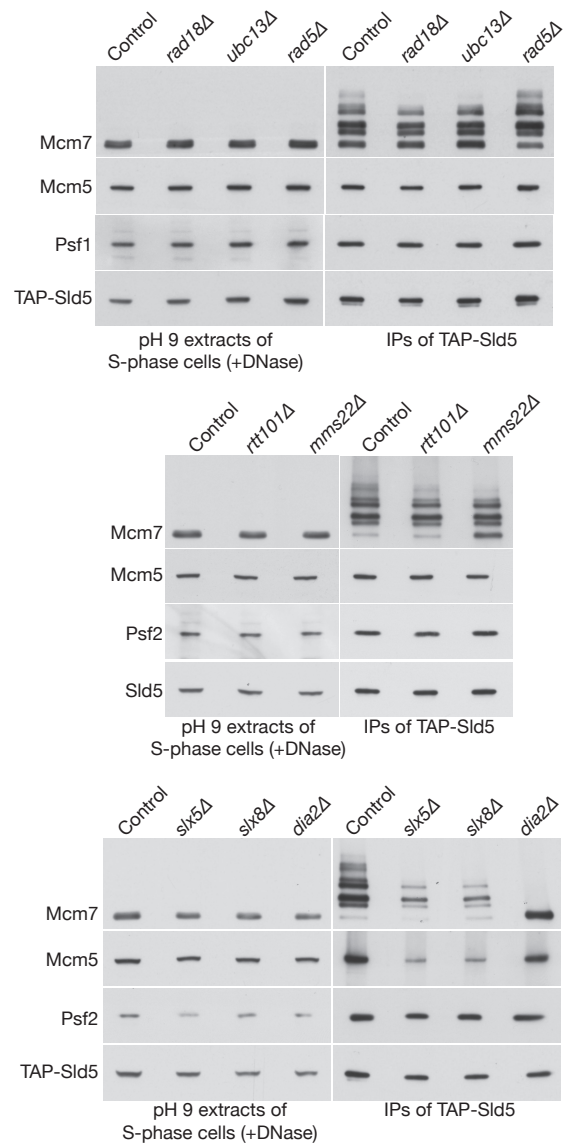

The CMG helicase is ubiquitylated *in vitro* in yeast cell extracts by the SCFDia2 ubiquitin ligase. The indicated strains were synchronised in S-phase at 30°C as above, and then used to prepare cell extracts at pH 9, in order to promote the specific ubiquitylation of the CMG helicase on its Mcm7 subunit. GINS was isolated as above, by immunoprecipitation of TAP-tagged Sld5.

# Maric-Maculins Supplementary Figure 3

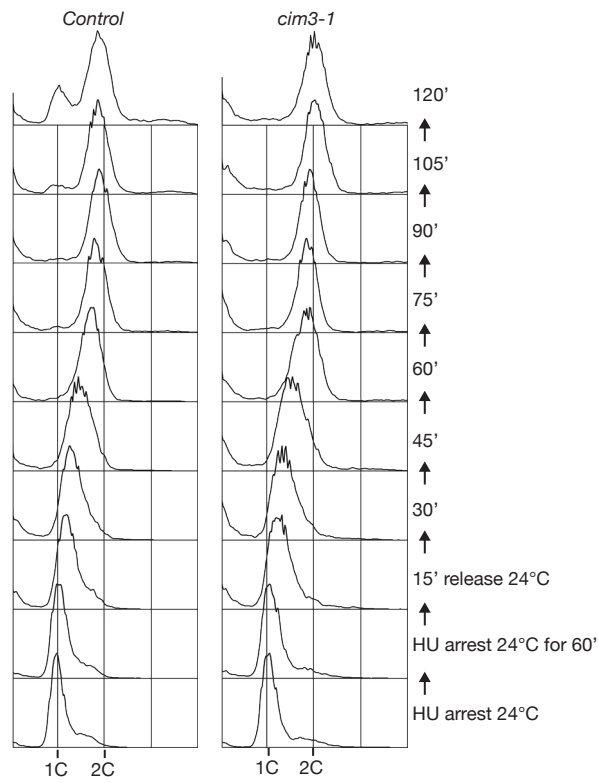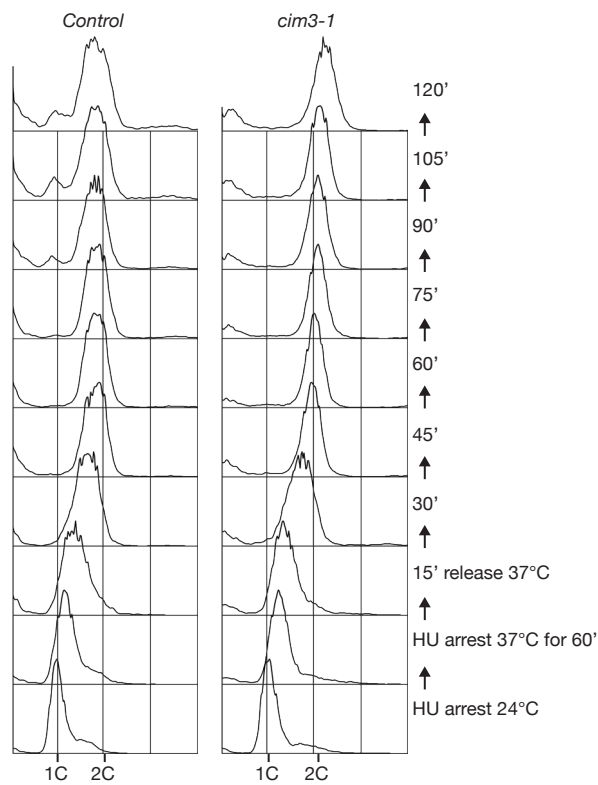

*cim3-1* cells are able to complete DNA replication at 37°C.  
The indicated cells were grown as shown and DNA content was monitored by flow cytometry.

Maric-Maculins Supplementary Figure 4

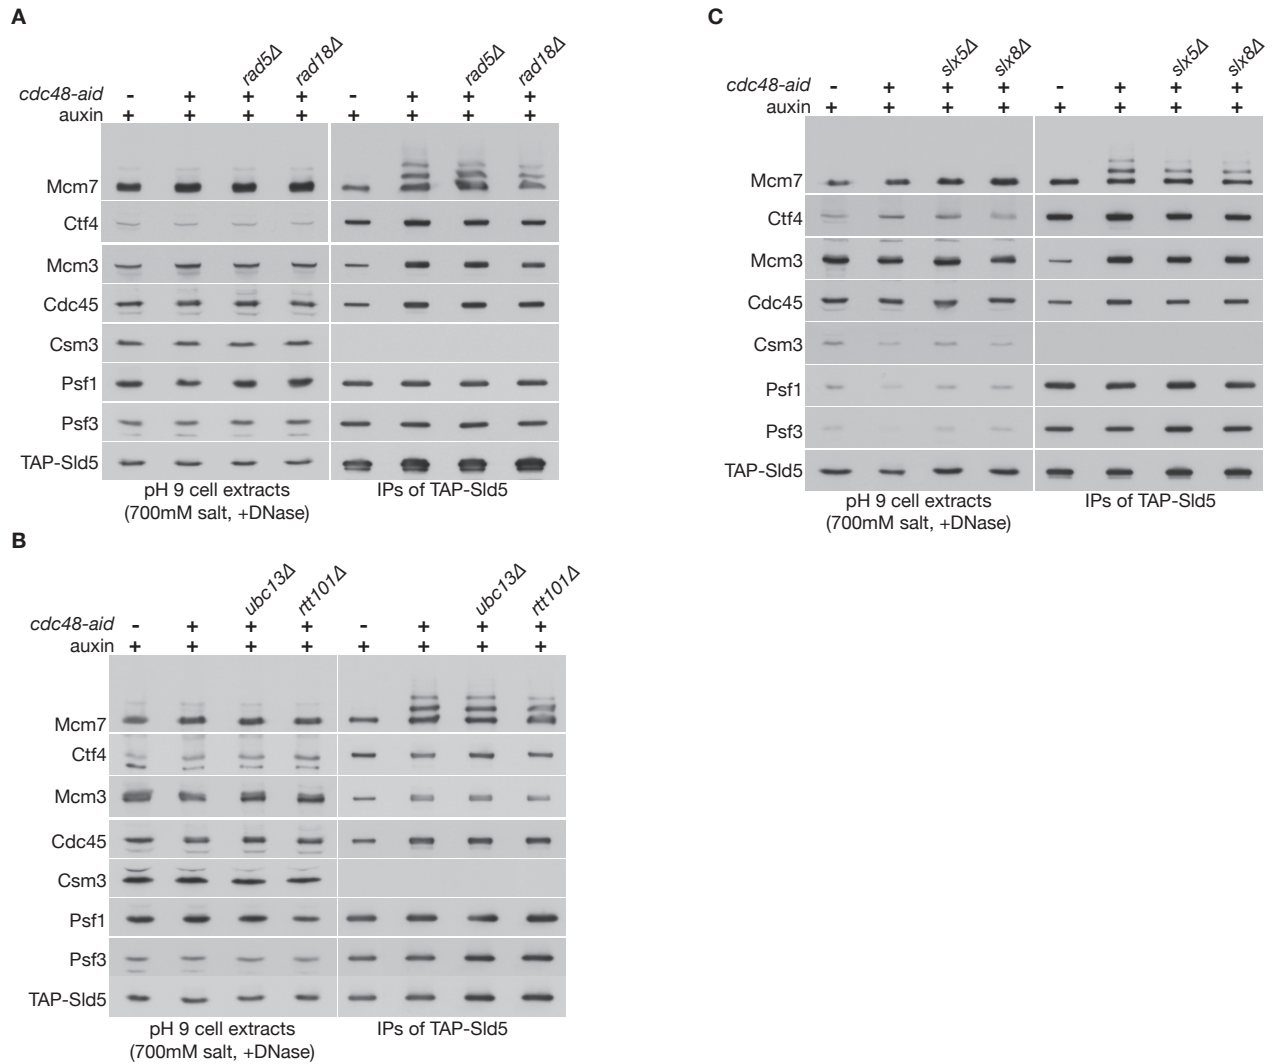

*In vivo* ubiquitylation of the CMG helicase requires the E3 ubiquitin ligase SCFDia2.

(A) Control (YMM256), *cdc48-aid* (YMM228), *cdc48-aid rad5Δ* (YMM340) and *cdc48-aid rad18Δ* (YMM341) cells were grown at 30°C, then incubated for 2 hours in the presence of auxin, before processing as in Fig. 3F.

(B) *cdc48-aid ubc13Δ* (YMM346) and *cdc48-aid rtt101Δ* (YMM351) were compared with controls in a similar experiment.

(C) An analogous experiment including *cdc48-aid slx5Δ* (YMM347) and *cdc48-aid slx8Δ* (YMM350).

Maric-Maculins Supplementary Figure 5

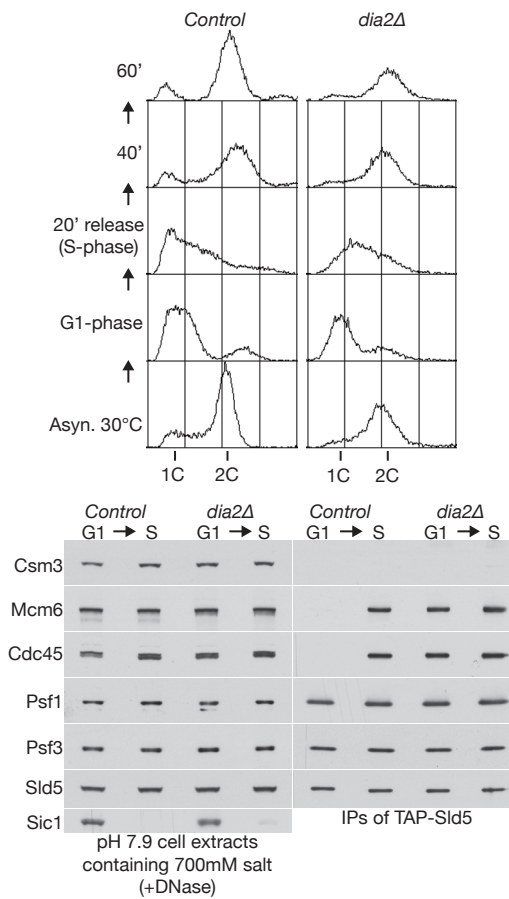

Stable CMG complexes are present during the G1-phase of the cell cycle in *dia2Δ* cells. The experiment in Fig. 4A was repeated, but the cell extracts contained 700mM potassium acetate, instead of 100mM. The CMG helicase is stable in these 'high salt extracts', although its interaction with other factors such as Csm3 is impaired (Ref. 1).

Maric-Maculins Supplementary Figure 6

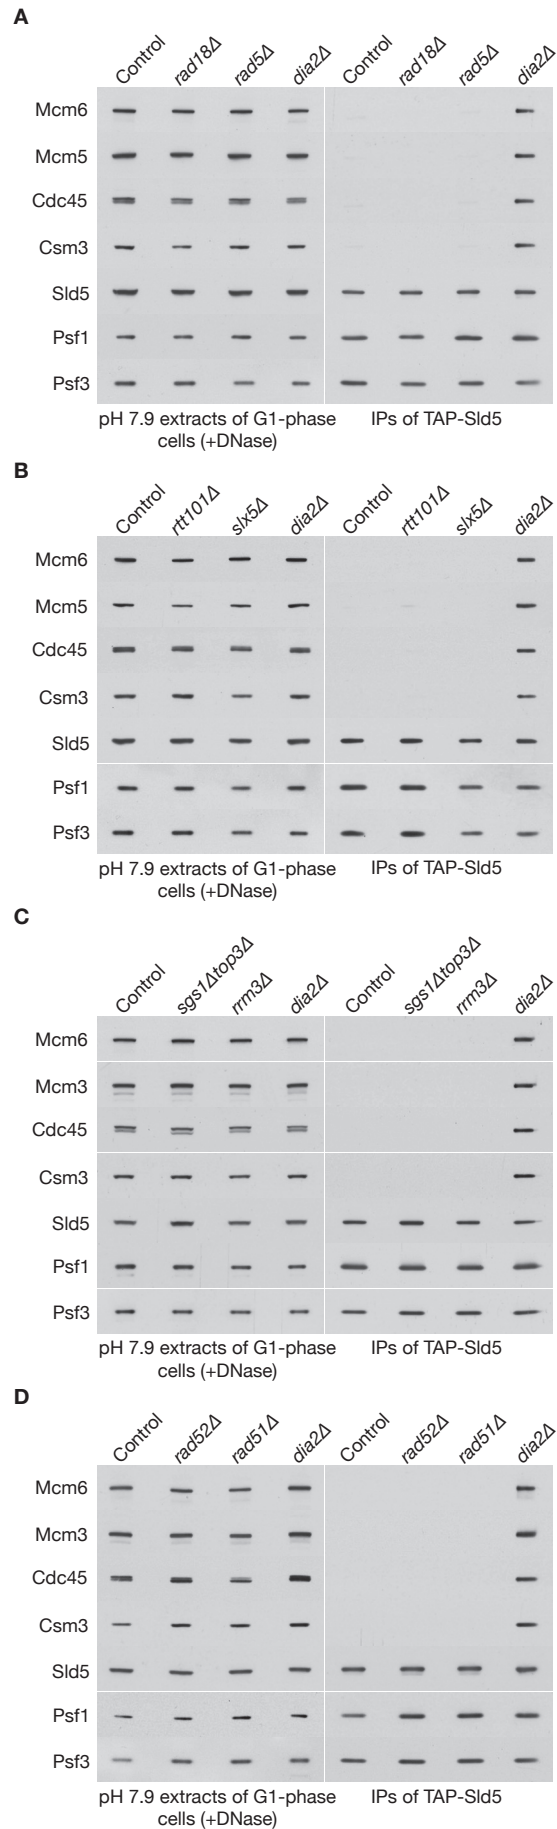

Persistence of the CMG helicase during G1-phase is unique to *dia2Δ* cells. (A-D) The indicated strains were arrested in G1-phase with mating pheromone, before isolation of GINS from cell extracts as above.



Maric-Maculins Supplementary Figure 7

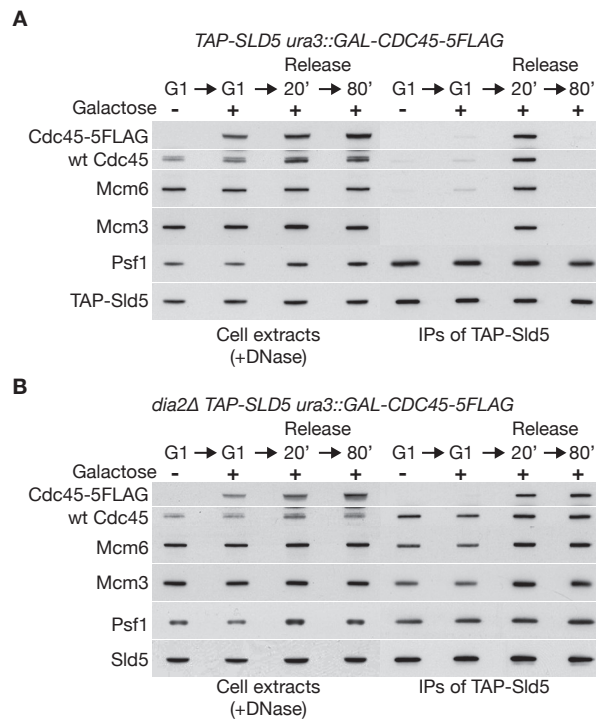

Dia2 is required for disassembly of the CMG helicase at the end of S-phase. A similar experiment to that in Fig. 5 was performed with control ((**A**), YTM577) and *dia2Δ* ((**B**), YTM576) cells, in which a *GAL-CDC45-5FLAG* construct had been integrated at the *ura3* locus. In this case, the cells expressed TAP-tagged Sld5, which was used to monitor the assembly and disassembly of the CMG helicase as above.

# Maric-Maculins Supplementary Figure 8

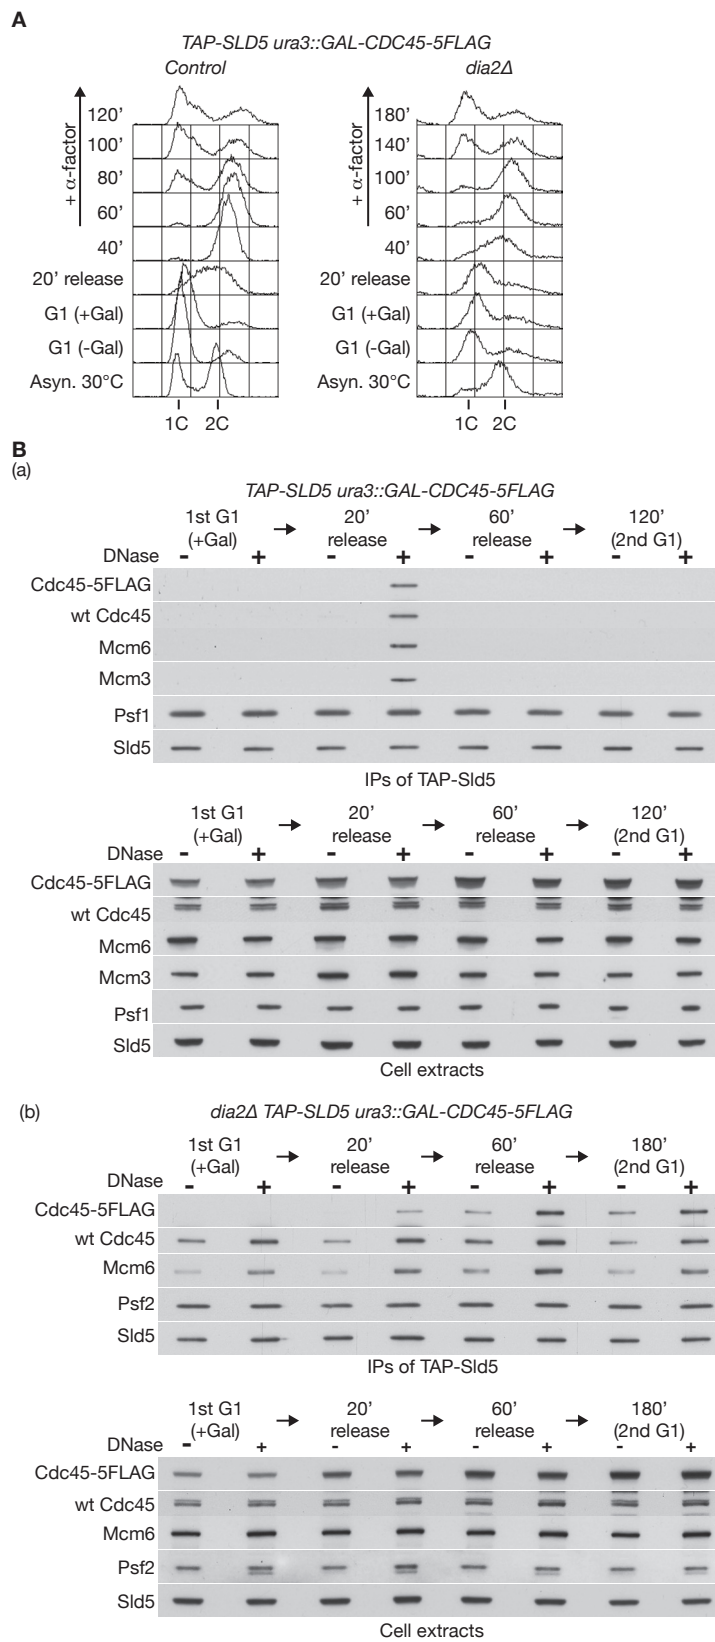

In the absence of Dia2, the CMG helicase persists into the next cell cycle, mostly associated with chromatin. A similar experiment to that in Supplementary Fig. 7 was performed, but the timecourse was extended to include G1-phase of the second cell cycle. Moreover, each cell extract was split into two aliquots, only one of which was treated with DNase to release protein complexes from chromatin.

# Maric-Maculins Supplementary Figure 9

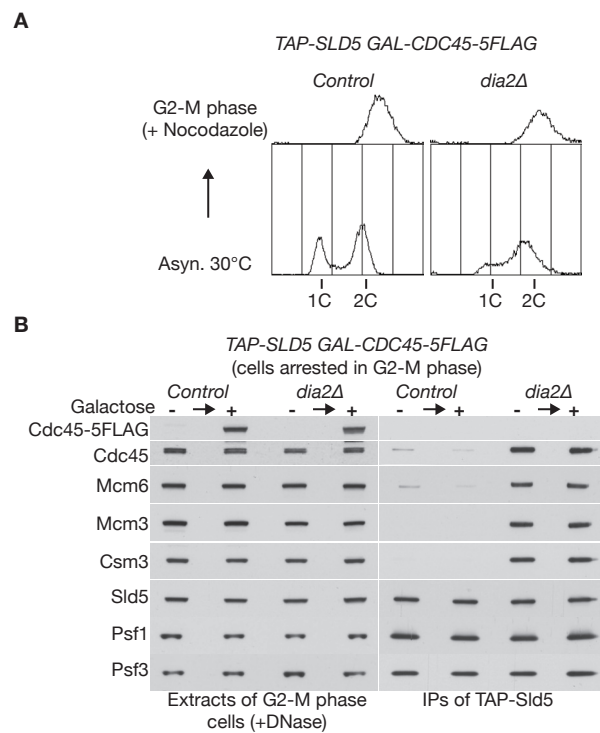

Persistence of the CMG helicase after S-phase in *dia2Δ* cells is not due to ongoing helicase assembly. The same strains as in Fig. S8 were arrested in G2-M phase by addition of nocodazole to the culture medium, before addition of galactose to induce expression of Cdc45-5FLAG from the *GAL* promoter. Extracts were then generated and used to isolate CMG complexes, by immunoprecipitation of TAP-Sld5. Tagged Cdc45-5FLAG was not incorporated into the CMG complexes that persisted in *dia2Δ* cells.

Maric-Maculins Supplementary Figure 10

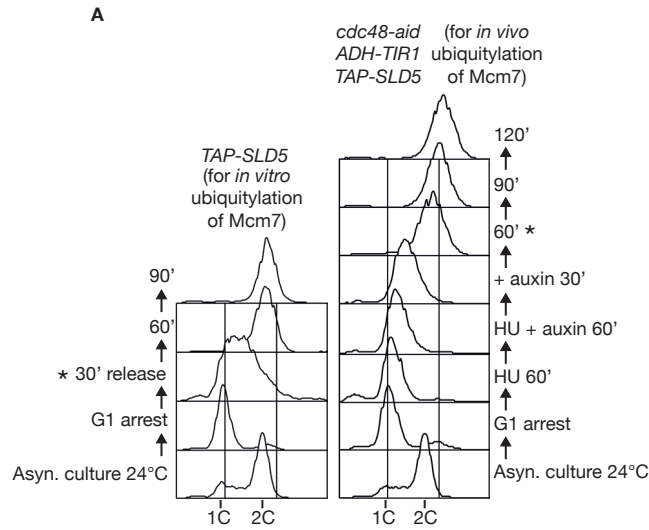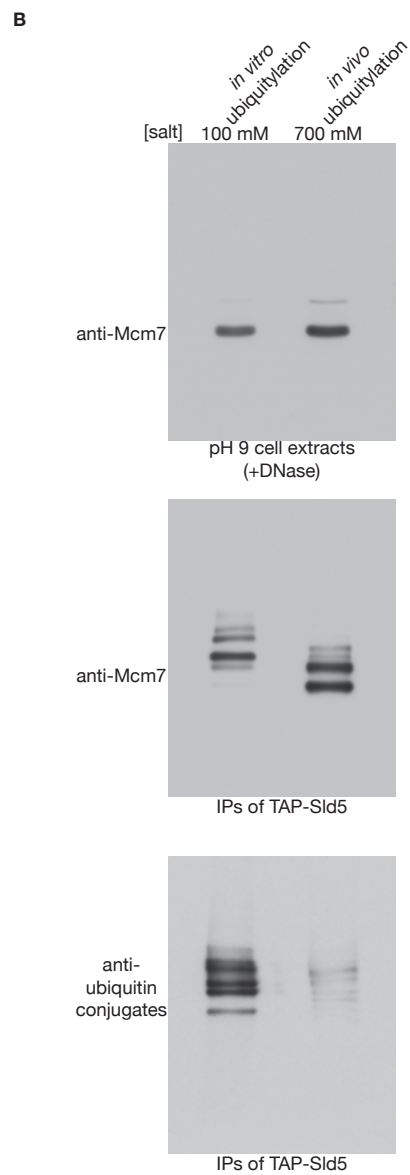

Comparison of *in vitro* and *in vivo* ubiquitylated forms of the Mcm7 subunit of the CMG helicase.

(A) Analogous experiments to those shown in Fig. S1A (YASD375, for *in vitro* ubiquitylation in 'pH9 cell extracts') and Fig. 8B (YMM228, for *in vivo* ubiquitylation) were performed, and the samples indicated by asterisks were used to prepare 'pH 9 cell extracts' in the presence of 100mM salt (for *in vitro* ubiquitylation) or 700mM salt (for analysis of *in vivo* ubiquitylation).

(B) Immunoprecipitates of TAP-Sld5 were probed with an anti-Mcm7 antibody, or with an antibody specific for conjugates of ubiquitin (FK2 antibody; see Methods for details). Although ubiquitylated Mcm7 is detected in both the *in vitro* and *in vivo* samples, the number of attached ubiquitin moieties is reproducibly different in the two cases. At present we cannot say whether this reflects *in vitro* and *in vivo* differences in the activity of deubiquitylase enzymes, or in the efficiency of ubiquitylation in the two cases, or both of the above.

Maric-Maculins Supplementary Figure 11

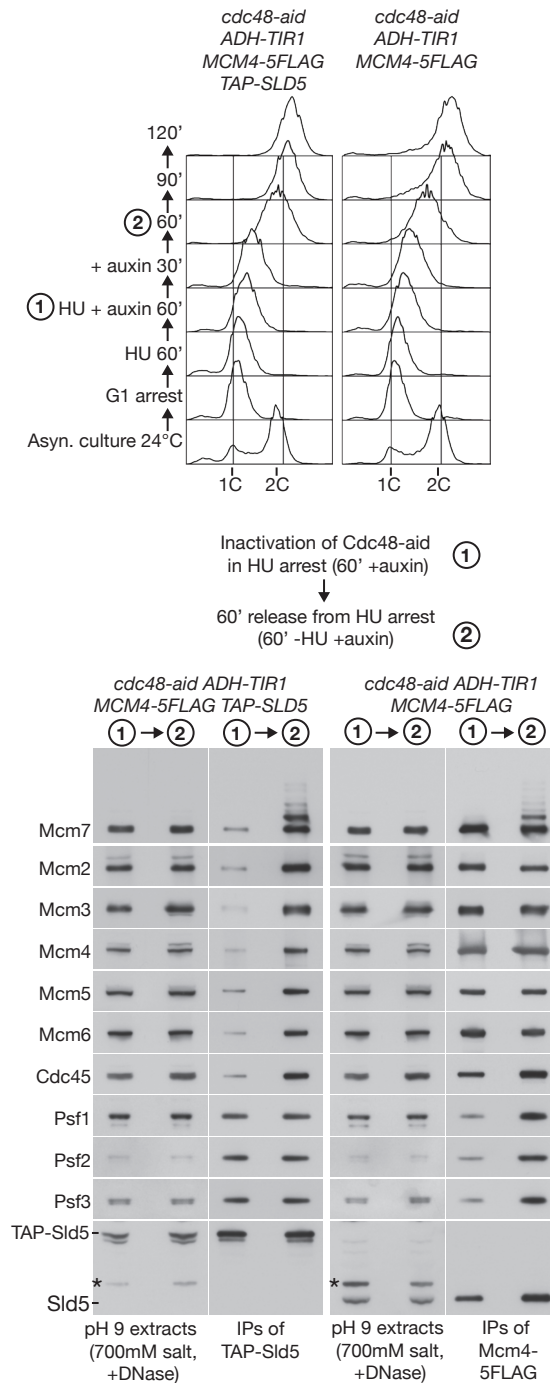

Ubiquitylation of CMG *in vivo* occurs on the Mcm7 subunit. As in Fig. 7, Cdc48-aid was inactivated in HU-arrested cells (YMM320 and YMM339), before release for 60' into fresh medium lacking HU. To examine modification of all 11 subunits of CMG, we compared immunoprecipitates of the Sld5 subunit of GINS (from YMM320, to examine associated Cdc45 and Mcm2-7), and the Mcm4 subunit of Mcm2-7 (from YMM339, to examine associated Cdc45 and GINS). The asterisk in the Sld5 immunoblots denotes a non-specific signal in the cell extracts.

# Maric-Maculins Supplementary Figure 12

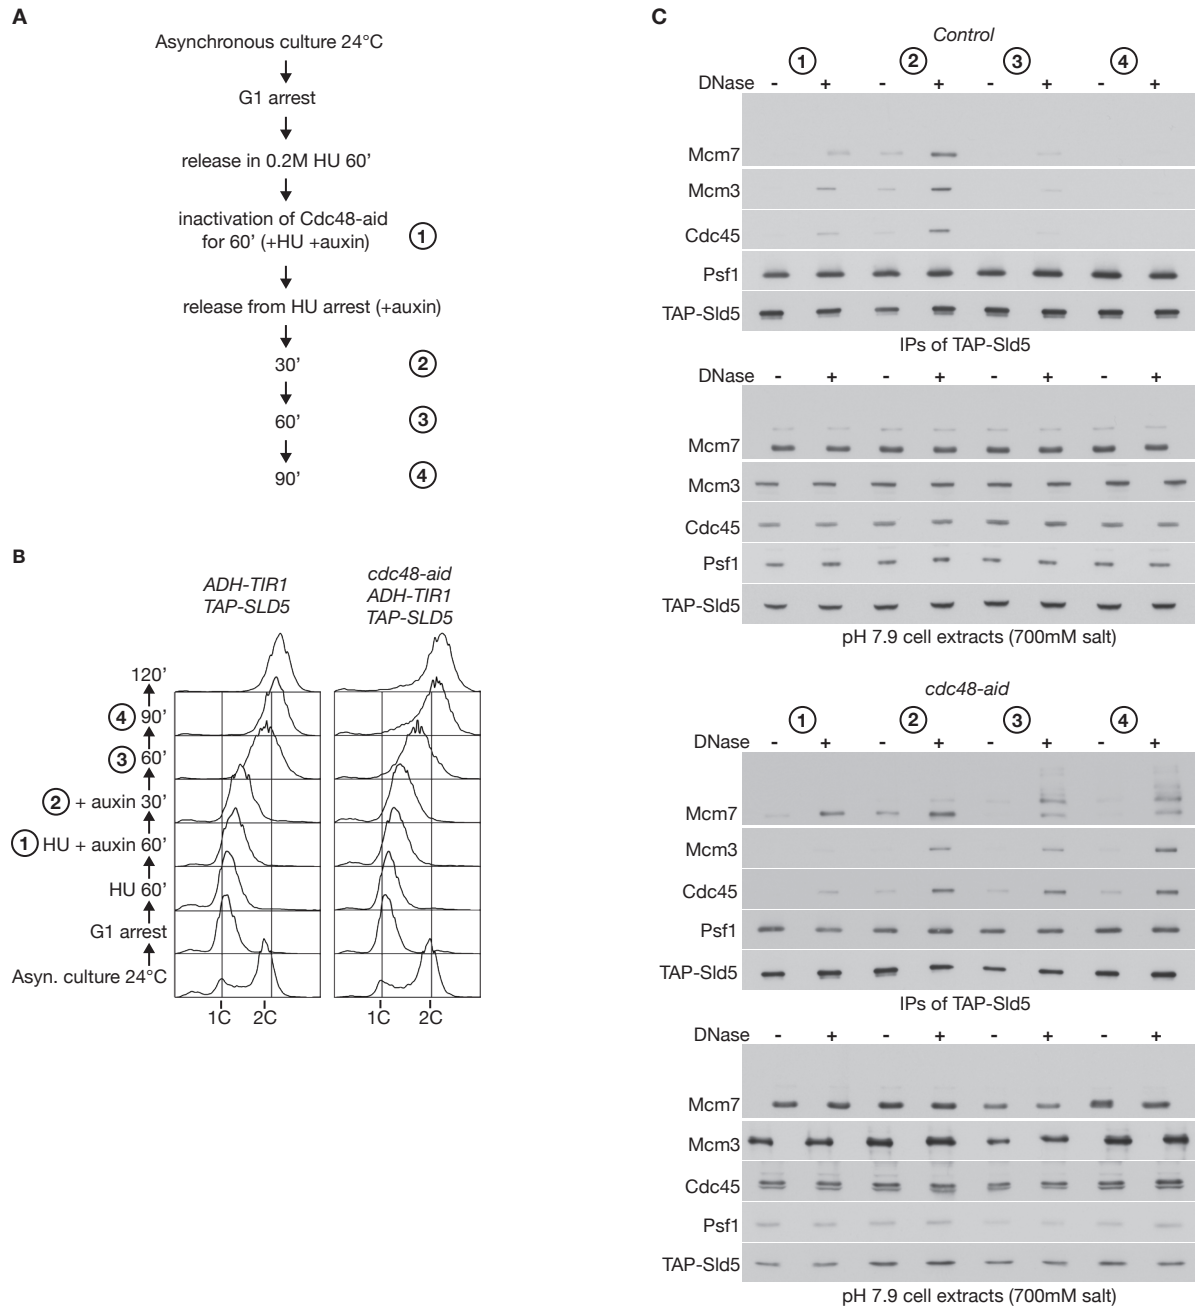

Ubiquitylated CMG helicase persists on chromatin in the absence of Cdc48 activity.

(A) The experiment in Fig. 8B was repeated.

(B) DNA content was measured by flow cytometry.

(C) Cell extracts were prepared at pH 7.9 in the presence of 700mM salt, with or without DNase treatment to digest chromosomal DNA, before immunoprecipitation of the TAP-tagged Sld5 subunit of CMG.

# Maric-Maculins Supplementary Figure 13

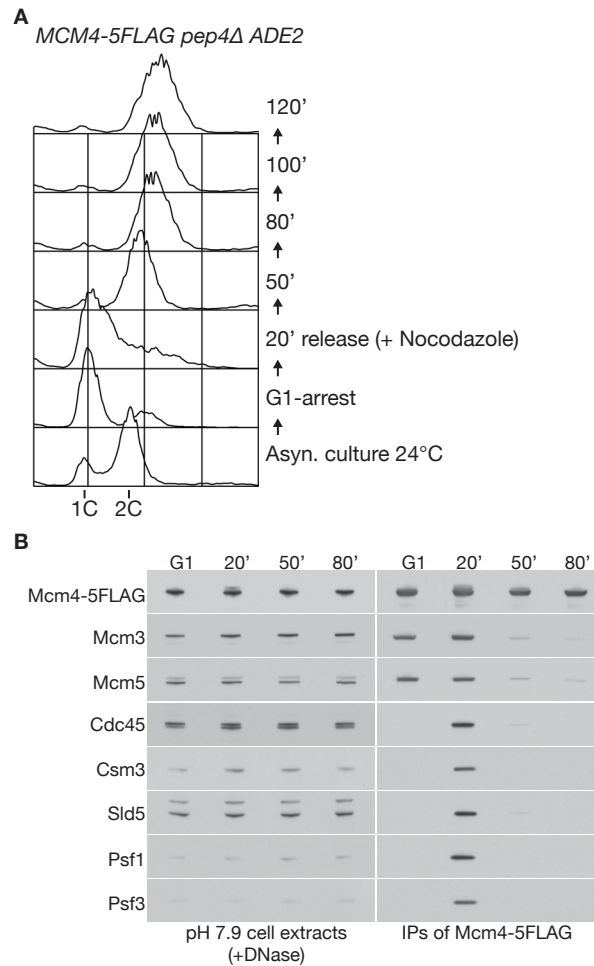

Stable Mcm2-7 complexes are lost during completion of DNA replication. *MCM4-5FLAG* (YHM42) cells were arrested in G1-phase and then released for the indicated times. Nocodazole was added after 20', to prevent progression through mitosis. Cell extracts were treated with DNase to release complexes from chromatin, and then Mcm4-5FLAG was isolated by immunoprecipitation. Stable Mcm2-7 complexes were detected during G1-phase and S-phase (in the latter case these were a mixture of inactive Mcm2-7 complexes and the CMG helicase), but then were lost when cells completed S-phase. These data indicate that the Mcm2-7 component of CMG is no longer stable when CMG disassembles at the end of S-phase. It thus seems likely that all three components of CMG (Cdc45, Mcm2-7 and GINS) are released from chromatin in a co-ordinated fashion during completion of replication.

Maric-Maculins Supplementary Figure 14

Related to Figure 1A

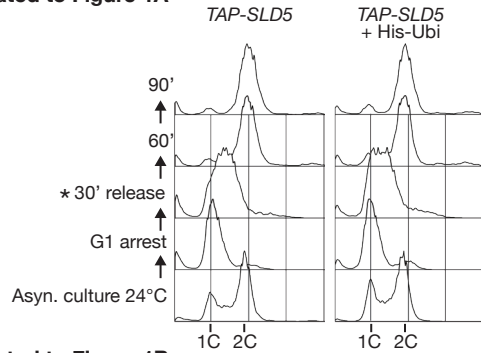

Related to Figure 2A

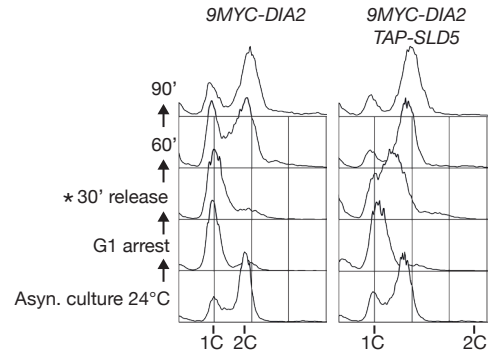

Related to Figure 1B

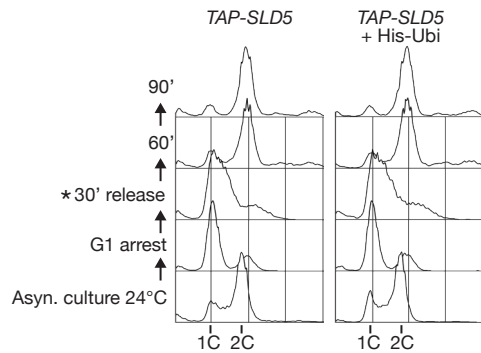

Related to Figure S1A

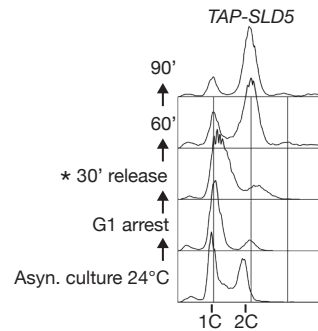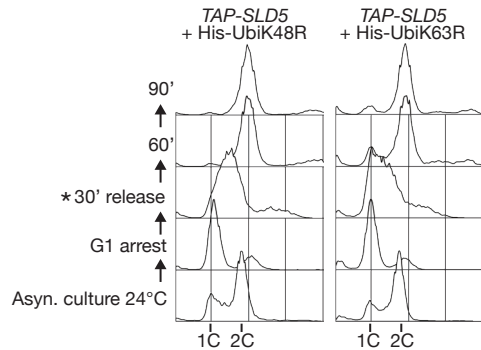

Related to Figure S1D

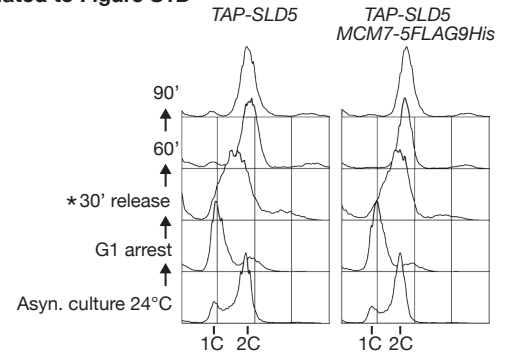

Related to Figure 1D

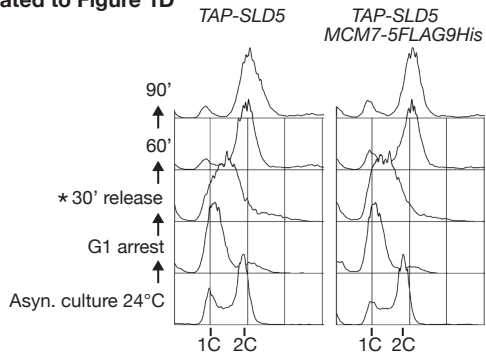

Additional flow cytometry data for the indicated experiments (where included, the asterisks denote the samples that were used to prepare cell extracts).



| <b>Strain</b> | <b>Genotype</b>                                                                                                                                                              |
|---------------|------------------------------------------------------------------------------------------------------------------------------------------------------------------------------|
| W303-1        | <i>MATa ade2-1 ura3-1 his3-11,15 trp1-1 leu2-3,112 can1-100 / MAT<math>\alpha</math> ade2-1 ura3-1 his3-11,15 trp1-1 leu2-3,112 can1-100</i>                                 |
| W303-1a       | <i>MATa ade2-1 ura3-1 his3-11,15 trp1-1 leu2-3,112 can1-100</i>                                                                                                              |
| YAG230-3      | <i>MATa TAP-SLD5 (kanMX) MCM4-5FLAG (hphNT) pep4<math>\Delta</math>::URA3 ADE2</i>                                                                                           |
| YASD375       | <i>MATa TAP-SLD5 (kanMX) pep4<math>\Delta</math>::URA3 ADE2</i>                                                                                                              |
| YGDP483       | <i>MATa TAP-SLD5 (kanMX) MCM7-5FLAG 9His (hphNT) pep4<math>\Delta</math>::URA3 ADE2</i>                                                                                      |
| YGDP671       | <i>MATa TAP-SLD5 (kanMX) rtt101<math>\Delta</math>::kanMX pep4<math>\Delta</math>::ADE2</i>                                                                                  |
| YGDP673       | <i>MATa TAP-SLD5 (kanMX) mms22<math>\Delta</math>::kanMX pep4<math>\Delta</math>::ADE2</i>                                                                                   |
| YHM42         | <i>MATa MCM4-5FLAG (hphNT) pep4<math>\Delta</math>::URA3 ADE2</i>                                                                                                            |
| YHM117        | <i>MATa 9MYC-DIA2 (kanMX) HRT1-6HA (K.I.TRP1) pep4<math>\Delta</math>::URA3</i>                                                                                              |
| YHM130        | <i>MATa TAP-SLD5 (kanMX) dia2<math>\Delta</math>::HIS3 pep4<math>\Delta</math>::URA3 ADE2</i>                                                                                |
| YHM132        | <i>MATa TAP-SLD5 (kanMX) 9MYC-DIA2 (kanMX) HRT1-6HA (K.I.TRP1) pep4<math>\Delta</math>::URA3 ADE2</i>                                                                        |
| YJW15         | <i>MATa ura3-1::ADH1-OsTIR1-9MYC (URA3)</i>                                                                                                                                  |
| YMM13         | <i>MATa TAP-SLD5 (kanMX) rad5<math>\Delta</math>::hphNT pep4<math>\Delta</math>::URA3 ADE2</i>                                                                               |
| YMM15         | <i>MATa TAP-SLD5 (kanMX) ubc13<math>\Delta</math>::hphNT pep4<math>\Delta</math>::URA3 ADE2</i>                                                                              |
| YMM22         | <i>MATa TAP-SLD5 (kanMX) pep4<math>\Delta</math>::URA3 ADE2 pRS423 (HIS3)</i>                                                                                                |
| YMM23         | <i>MATa TAP-SLD5 (kanMX) pep4<math>\Delta</math>::URA3 ADE2 pRS423-CUP-His7-Ubi (HIS3)</i>                                                                                   |
| YMM24         | <i>MATa TAP-SLD5 (kanMX) rad18<math>\Delta</math>::hphNT pep4<math>\Delta</math>::URA3 ADE2</i>                                                                              |
| YMM70         | <i>MATa dia2<math>\Delta</math>::HIS3 pep4<math>\Delta</math>::URA3 ADE2</i>                                                                                                 |
| YMM74         | <i>MATa MCM4-5FLAG (hphNT) cdc45-td (kanMX) GAL-UBR1 (HIS3) pep4<math>\Delta</math>::URA3 ADE2</i>                                                                           |
| YMM89         | <i>MATa TAP-SLD5 (kanMX) pep4<math>\Delta</math>::URA3 ADE2 pRS423-CUP-His7-UbiK48R (HIS3)</i>                                                                               |
| YMM90         | <i>MATa TAP-SLD5 (kanMX) pep4<math>\Delta</math>::URA3 ADE2 pRS423-CUP-His7-UbiK63R (HIS3)</i>                                                                               |
| YMM203        | <i>MATa cdc48-aid (hphNT) ura3-1::ADH1-OsTIR1-9MYC (URA3 &amp; K.I.TRP1)</i>                                                                                                 |
| YMM206        | <i>MATa TAP-SLD5 (kanMX) cim3-1 pep4<math>\Delta</math>::URA3 ADE2</i>                                                                                                       |
| YMM214        | <i>MATa TAP-SLD5 (kanMX) cdc48-3 pep4<math>\Delta</math>::URA3 ADE2</i>                                                                                                      |
| YMM228        | <i>MATa TAP-SLD5 (kanMX) cdc48-aid (hphNT) ura3-1::ADH1-OsTIR1-9MYC (URA3 &amp; K.I.TRP1) pep4<math>\Delta</math>::URA3 ADE2</i>                                             |
| YMM256        | <i>MATa TAP-SLD5 (kanMX) ura3-1::ADH1-OsTIR1-9MYC (URA3 &amp; K.I.TRP1) pep4<math>\Delta</math>::URA3 ADE2</i>                                                               |
| YMM283        | <i>MATa TAP-SLD5 (kanMX) GALL-DIA2 (kanMX) cdc48-aid (hphNT) ura3-1::ADH1-OsTIR1-9MYC (URA3 &amp; K.I.TRP1) pep4<math>\Delta</math>::ADE2</i>                                |
| YMM309        | <i>MATa TAP-SLD5 (kanMX) dbf4-4A (HIS3) sld3-37A-10HIS-13MYC (kanMX) cdc48-aid (hphNT) ura3-1::ADH1-OsTIR1-9MYC (URA3 &amp; K.I.TRP1) pep4<math>\Delta</math>::URA3 ADE2</i> |
| YMM320        | <i>MATa TAP-SLD5 (kanMX) MCM4-5FLAG (hphNT) cdc48-aid (hphNT) ura3-1::ADH1-OsTIR1-9MYC (URA3 &amp; K.I.TRP1)</i>                                                             |

|        |                                                                                                                                   |
|--------|-----------------------------------------------------------------------------------------------------------------------------------|
|        | <i>pep4Δ::URA3 ADE2</i>                                                                                                           |
| YMM339 | <i>MATa MCM4-5FLAG (hphNT) cdc48-aid (hphNT) ura3-1::ADH1-OsTIR1-9MYC (URA3 &amp; K.I.TRP1) pep4Δ::URA3 ADE2</i>                  |
| YMM340 | <i>MATa TAP-SLD5 (kanMX) rad5Δ::hphNT cdc48-aid (hphNT) ura3-1::ADH1-OsTIR1-9MYC (URA3 &amp; K.I.TRP1) pep4Δ::URA3 ADE2</i>       |
| YMM341 | <i>MATa TAP-SLD5 (kanMX) rad18Δ::hphNT cdc48-aid (hphNT) ura3-1::ADH1-OsTIR1-9MYC (URA3 &amp; K.I.TRP1) pep4Δ::URA3 ADE2</i>      |
| YMM346 | <i>MATa TAP-SLD5 (kanMX) ubc13Δ::hphNT cdc48-aid (hphNT) ura3-1::ADH1-OsTIR1-9MYC (URA3 &amp; K.I.TRP1) pep4Δ::URA3 ADE2</i>      |
| YMM347 | <i>MATa TAP-SLD5 (kanMX) slx5Δ::kanMX cdc48-aid (hphNT) ura3-1::ADH1-OsTIR1-9MYC (URA3 &amp; K.I.TRP1) pep4Δ::URA3 ADE2</i>       |
| YMM350 | <i>MATa TAP-SLD5 (kanMX) slx8Δ::kanMX cdc48-aid (hphNT) ura3-1::ADH1-OsTIR1-9MYC (URA3 &amp; K.I.TRP1) pep4Δ::URA3 ADE2</i>       |
| YMM351 | <i>MATa TAP-SLD5 (kanMX) rtt101Δ::kanMX cdc48-aid (hphNT) ura3-1::ADH1-OsTIR1-9MYC (URA3 &amp; K.I.TRP1) pep4Δ::URA3 ADE2</i>     |
| YMM366 | <i>MATa TAP-SLD5 (kanMX) sml1Δ::HIS3 cdc48-aid (hphNT) ura3-1::ADH1-OsTIR1-9MYC (URA3 &amp; K.I.TRP1) pep4Δ::URA3 ADE2</i>        |
| YMM368 | <i>MATa TAP-SLD5 (kanMX) sml1Δ::HIS3 mec1Δ::ADE2 cdc48-aid (hphNT) ura3-1::ADH1-OsTIR1-9MYC (URA3 &amp; K.I.TRP1) pep4Δ::URA3</i> |
| YSS184 | <i>MATa MCM4-5FLAG (hphNT) GAL-UBR1 (HIS3) pep4Δ::URA3 ADE2</i>                                                                   |
| YTM214 | <i>MATa TAP-SLD5 (kanMX) slx5Δ::kanMX pep4Δ::URA3 ADE2</i>                                                                        |
| YTM216 | <i>MATa TAP-SLD5 (kanMX) slx8Δ::kanMX pep4Δ::URA3 ADE2</i>                                                                        |
| YTM305 | <i>MATa MCM7-5FLAG 9His (hphNT) pep4Δ::URA3 ADE2</i>                                                                              |
| YTM306 | <i>MATa MCM7-5FLAG 9His (hphNT) dia2Δ::HIS3 pep4Δ::URA3 ADE2</i>                                                                  |
| YTM312 | <i>MATa MCM7-5FLAG 9His (hphNT) ura3-1::GAL-5FLAG-DIA2 (URA3) pep4Δ::URA3</i>                                                     |
| YTM330 | <i>MATa GAL-UBR1 (HIS3) pep4Δ::URA3 ADE2</i>                                                                                      |
| YTM371 | <i>MATa TAP-SLD5 (kanMX) rrm3Δ::hphNT pep4Δ::ADE2</i>                                                                             |
| YTM376 | <i>MATa cdc34-2 pep4Δ::ADE2</i>                                                                                                   |
| YTM396 | <i>MATa CDC34-TAP (kanMX) pep4Δ::ADE2</i>                                                                                         |
| YTM415 | <i>MATa CDC45-ProteinA (kanMX) dia2Δ::HIS3 pep4Δ::ADE2</i>                                                                        |
| YTM444 | <i>MATa td-cdc53-1 (kanMX) GAL-UBR1 (HIS3) pep4Δ::URA3 ADE2</i>                                                                   |
| YTM445 | <i>MATa td-cdc4-1 (kanMX) GAL-UBR1 (HIS3) pep4Δ::URA3 ADE2</i>                                                                    |
| YTM532 | <i>MATa MCM7-5FLAG 9His (hphNT) ura3-1::GAL-ProteinA-DIA2 (URA3) dia2Δ::HIS3 pep4Δ::URA3 ADE2</i>                                 |
| YTM568 | <i>MATa TAP-SLD5 (kanMX) GALL-DIA2 (kanMX) pep4Δ::ADE2</i>                                                                        |
| YTM576 | <i>MATa TAP-SLD5 (kanMX) ura3-1::GAL-CDC45-5FLAG 9His (URA3) dia2Δ::HIS3 pep4Δ::ADE2</i>                                          |
| YTM577 | <i>MATa TAP-SLD5 (kanMX) ura3-1::GAL-CDC45-5FLAG 9His (URA3) pep4Δ::ADE2</i>                                                      |
| YTM592 | <i>MATa TAP-MCM3 (kanMX) ura3-1::GAL-PSF2-5FLAG (URA3) dia2Δ::HIS3 pep4Δ::ADE2</i>                                                |
| YTM593 | <i>MATa TAP-MCM3 (kanMX) ura3-1::GAL-PSF2-5FLAG (URA3) pep4Δ::ADE2</i>                                                            |

|        |                                                                              |
|--------|------------------------------------------------------------------------------|
| YTM687 | <i>MATa TAP-SLD5 (kanMX) MCM4-5FLAG (hphNT) dia2Δ::HIS3 pep4Δ::URA3 ADE2</i> |
| YTM688 | <i>MATa TAP-SLD5 (kanMX) rad52Δ::kanMX pep4Δ::ADE2</i>                       |
| YTM689 | <i>MATa TAP-SLD5 (kanMX) rad51Δ::kanMX pep4Δ::ADE2</i>                       |
| YTM709 | <i>MATa TAP-SLD5 (kanMX) sgs1Δ::URA3CP top3Δ::kanMX pep4Δ::ADE2</i>          |

**Table S1**

Yeast strains used in this study. All strains are based on the W303 background.

## References and Notes

1. A. Gambus, R. C. Jones, A. Sanchez-Diaz, M. Kanemaki, F. van Deursen, R. D. Edmondson, K. Labib, GINS maintains association of Cdc45 with MCM in replisome progression complexes at eukaryotic DNA replication forks. *Nat. Cell Biol.* **8**, 358–366 (2006). [Medline](#) [doi:10.1038/ncb1382](#)
2. S. E. Moyer, P. W. Lewis, M. R. Botchan, Isolation of the Cdc45/Mcm2-7/GINS (CMG) complex, a candidate for the eukaryotic DNA replication fork helicase. *Proc. Natl. Acad. Sci. U.S.A.* **103**, 10236–10241 (2006). [Medline](#) [doi:10.1073/pnas.0602400103](#)
3. Y. Li, H. Araki, Loading and activation of DNA replicative helicases: The key step of initiation of DNA replication. *Genes Cells* **18**, 266–277 (2013). [Medline](#) [doi:10.1111/gtc.12040](#)
4. D. Boos, J. Frigola, J. F. Diffley, Activation of the replicative DNA helicase: Breaking up is hard to do. *Curr. Opin. Cell Biol.* **24**, 423–430 (2012). [Medline](#) [doi:10.1016/j.ceb.2012.01.011](#)
5. K. Labib, How do Cdc7 and cyclin-dependent kinases trigger the initiation of chromosome replication in eukaryotic cells? *Genes Dev.* **24**, 1208–1219 (2010). [Medline](#) [doi:10.1101/gad.1933010](#)
6. K. Labib, J. A. Tercero, J. F. X. Diffley, Uninterrupted MCM2-7 function required for DNA replication fork progression. *Science* **288**, 1643–1647 (2000). [Medline](#) [doi:10.1126/science.288.5471.1643](#)
7. R. Y. Samson, S. D. Bell, MCM loading—an open-and-shut case? *Mol. Cell* **50**, 457–458 (2013). [Medline](#) [doi:10.1016/j.molcel.2013.05.008](#)
8. T. J. Takara, S. P. Bell, Putting two heads together to unwind DNA. *Cell* **139**, 652–654 (2009). [Medline](#) [doi:10.1016/j.cell.2009.10.037](#)
9. H. Yardimci, J. C. Walter, Prereplication-complex formation: A molecular double take? *Nat. Struct. Mol. Biol.* **21**, 20–25 (2014). [Medline](#) [doi:10.1038/nsmb.2738](#)
10. A. Calzada, B. Hodgson, M. Kanemaki, A. Bueno, K. Labib, Molecular anatomy and regulation of a stable replisome at a paused eukaryotic DNA replication fork. *Genes Dev.* **19**, 1905–1919 (2005). [Medline](#) [doi:10.1101/gad.337205](#)
11. M. Pacek, A. V. Tutter, Y. Kubota, H. Takisawa, J. C. Walter, Localization of MCM2-7, Cdc45, and GINS to the site of DNA unwinding during eukaryotic DNA replication. *Mol. Cell* **21**, 581–587 (2006). [Medline](#) [doi:10.1016/j.molcel.2006.01.030](#)
12. C. Evrin, P. Clarke, J. Zech, R. Lurz, J. Sun, S. Uhle, H. Li, B. Stillman, C. Speck, A double-hexameric MCM2-7 complex is loaded onto origin DNA during licensing of eukaryotic DNA replication. *Proc. Natl. Acad. Sci. U.S.A.* **106**, 20240–20245 (2009). [Medline](#) [doi:10.1073/pnas.0911500106](#)
13. D. Remus, F. Beuron, G. Tolun, J. D. Griffith, E. P. Morris, J. F. Diffley, Concerted loading of Mcm2-7 double hexamers around DNA during DNA replication origin licensing. *Cell* **139**, 719–730 (2009). [Medline](#) [doi:10.1016/j.cell.2009.10.015](#)

14. F. van Deursen, S. Sengupta, G. De Piccoli, A. Sanchez-Diaz, K. Labib, Mcm10 associates with the loaded DNA helicase at replication origins and defines a novel step in its activation. *EMBO J.* **31**, 2195–2206 (2012). [Medline doi:10.1038/emboj.2012.69](#)
15. S. Bergink, S. Jentsch, Principles of ubiquitin and SUMO modifications in DNA repair. *Nature* **458**, 461–467 (2009). [Medline doi:10.1038/nature07963](#)
16. H. D. Ulrich, H. Walden, Ubiquitin signalling in DNA replication and repair. *Nat. Rev. Mol. Cell Biol.* **11**, 479–489 (2010). [Medline doi:10.1038/nrm2921](#)
17. I. W. Zaidi, G. Rabut, A. Poveda, H. Scheel, J. Malmström, H. Ulrich, K. Hofmann, P. Pasero, M. Peter, B. Luke, Rtt101 and Mms1 in budding yeast form a CUL4(DDB1)-like ubiquitin ligase that promotes replication through damaged DNA. *EMBO Rep.* **9**, 1034–1040 (2008). [Medline doi:10.1038/embor.2008.155](#)
18. M. C. Geoffroy, R. T. Hay, An additional role for SUMO in ubiquitin-mediated proteolysis. *Nat. Rev. Mol. Cell Biol.* **10**, 564–568 (2009). [Medline doi:10.1038/nrm2707](#)
19. A. M. Sriramachandran, R. J. Dohmen, SUMO-targeted ubiquitin ligases. *Biochim. Biophys. Acta* **1843**, 75–85 (2014). [Medline doi:10.1016/j.bbamcr.2013.08.022](#)
20. D. Blake, B. Luke, P. Kanellis, P. Jorgensen, T. Goh, S. Penfold, B. J. Bretkreutz, D. Durocher, M. Peter, M. Tyers, The F-box protein Dia2 overcomes replication impedance to promote genome stability in *Saccharomyces cerevisiae*. *Genetics* **174**, 1709–1727 (2006). [Medline doi:10.1534/genetics.106.057836](#)
21. D. M. Koepp, A. C. Kile, S. Swaminathan, V. Rodriguez-Rivera, The F-box protein Dia2 regulates DNA replication. *Mol. Biol. Cell* **17**, 1540–1548 (2006). [Medline doi:10.1091/mbc.E05-09-0884](#)
22. X. Pan, P. Ye, D. S. Yuan, X. Wang, J. S. Bader, J. D. Boeke, A DNA integrity network in the yeast *Saccharomyces cerevisiae*. *Cell* **124**, 1069–1081 (2006). [Medline doi:10.1016/j.cell.2005.12.036](#)
23. H. Morohashi, T. Maculins, K. Labib, The amino-terminal TPR domain of Dia2 tethers SCF(Dia2) to the replisome progression complex. *Curr. Biol.* **19**, 1943–1949 (2009). [Medline doi:10.1016/j.cub.2009.09.062](#)
24. S. Sengupta, F. van Deursen, G. de Piccoli, K. Labib, Dpb2 integrates the leading-strand DNA polymerase into the eukaryotic replisome. *Curr. Biol.* **23**, 543–552 (2013). [Medline doi:10.1016/j.cub.2013.02.011](#)
25. D. Finley, H. D. Ulrich, T. Sommer, P. Kaiser, The ubiquitin-proteasome system of *Saccharomyces cerevisiae*. *Genetics* **192**, 319–360 (2012). [Medline doi:10.1534/genetics.112.140467](#)
26. H. Meyer, M. Bug, S. Bremer, Emerging functions of the VCP/p97 AAA-ATPase in the ubiquitin system. *Nat. Cell Biol.* **14**, 117–123 (2012). [Medline doi:10.1038/ncb2407](#)
27. M. Ghislain, A. Udvardy, C. Mann, *S. cerevisiae* 26S protease mutants arrest cell division in G2/metaphase. *Nature* **366**, 358–362 (1993). [Medline doi:10.1038/366358a0](#)

28. K. Nishimura, T. Fukagawa, H. Takisawa, T. Kakimoto, M. Kanemaki, An auxin-based degron system for the rapid depletion of proteins in nonplant cells. *Nat. Methods* **6**, 917–922 (2009). [Medline doi:10.1038/nmeth.1401](#)
29. C. Janke, M. M. Magiera, N. Rathfelder, C. Taxis, S. Reber, H. Maekawa, A. Moreno-Borchart, G. Doenges, E. Schwob, E. Schiebel, M. Knop, A versatile toolbox for PCR-based tagging of yeast genes: New fluorescent proteins, more markers and promoter substitution cassettes. *Yeast* **21**, 947–962 (2004). [Medline doi:10.1002/yea.1142](#)
30. D. Mumberg, R. Müller, M. Funk, Regulatable promoters of *Saccharomyces cerevisiae*: Comparison of transcriptional activity and their use for heterologous expression. *Nucleic Acids Res.* **22**, 5767–5768 (1994). [Medline doi:10.1093/nar/22.25.5767](#)
31. K. Acs, M. S. Luijsterburg, L. Ackermann, F. A. Salomons, T. Hoppe, N. P. Dantuma, The AAA-ATPase VCP/p97 promotes 53BP1 recruitment by removing L3MBTL1 from DNA double-strand breaks. *Nat. Struct. Mol. Biol.* **18**, 1345–1350 (2011). [Medline doi:10.1038/nsmb.2188](#)
32. S. Bergink, T. Ammon, M. Kern, L. Schermelleh, H. Leonhardt, S. Jentsch, Role of Cdc48/p97 as a SUMO-targeted segregase curbing Rad51-Rad52 interaction. *Nat. Cell Biol.* **15**, 526–532 (2013). [Medline doi:10.1038/ncb2729](#)
33. E. J. Davis, C. Lachaud, P. Appleton, T. J. Macartney, I. Näthke, J. Rouse, DVC1 (C1orf124) recruits the p97 protein segregase to sites of DNA damage. *Nat. Struct. Mol. Biol.* **19**, 1093–1100 (2012). [Medline doi:10.1038/nsmb.2394](#)
34. M. Meerang, D. Ritz, S. Paliwal, Z. Garajova, M. Bosshard, N. Mailand, P. Janscak, U. Hübscher, H. Meyer, K. Ramadan, The ubiquitin-selective segregase VCP/p97 orchestrates the response to DNA double-strand breaks. *Nat. Cell Biol.* **13**, 1376–1382 (2011). [Medline doi:10.1038/ncb2367](#)
35. A. Mosbech, I. Gibbs-Seymour, K. Kagias, T. Thorslund, P. Beli, L. Povlsen, S. V. Nielsen, S. Smedegaard, G. Sedgwick, C. Lukas, R. Hartmann-Petersen, J. Lukas, C. Choudhary, R. Pocock, S. Bekker-Jensen, N. Mailand, DVC1 (C1orf124) is a DNA damage-targeting p97 adaptor that promotes ubiquitin-dependent responses to replication blocks. *Nat. Struct. Mol. Biol.* **19**, 1084–1092 (2012). [Medline doi:10.1038/nsmb.2395](#)
36. J. Mouysset, A. Deichsel, S. Moser, C. Hoege, A. A. Hyman, A. Gartner, T. Hoppe, Cell cycle progression requires the CDC-48UFD-1/NPL-4 complex for efficient DNA replication. *Proc. Natl. Acad. Sci. U.S.A.* **105**, 12879–12884 (2008). [Medline doi:10.1073/pnas.0805944105](#)
37. M. Raman, C. G. Havens, J. C. Walter, J. W. Harper, A genome-wide screen identifies p97 as an essential regulator of DNA damage-dependent CDT1 destruction. *Mol. Cell* **44**, 72–84 (2011). [Medline doi:10.1016/j.molcel.2011.06.036](#)
38. M. Jagannathan, T. Nguyen, D. Gallo, N. Luthra, G. W. Brown, V. Saridakis, L. Frappier, A role for USP7 in DNA replication. *Mol. Cell. Biol.* **34**, 132–145 (2014). [Medline doi:10.1128/MCB.00639-13](#)
39. A. Nishiyama, L. Frappier, M. Méchali, MCM-BP regulates unloading of the MCM2-7 helicase in late S phase. *Genes Dev.* **25**, 165–175 (2011). [Medline doi:10.1101/gad.614411](#)

40. D. Fachinetti, R. Bermejo, A. Cocito, S. Minardi, Y. Katou, Y. Kanoh, K. Shirahige, A. Azvolinsky, V. A. Zakian, M. Foiani, Replication termination at eukaryotic chromosomes is mediated by Top2 and occurs at genomic loci containing pausing elements. *Mol. Cell* **39**, 595–605 (2010). [Medline doi:10.1016/j.molcel.2010.07.024](#)
41. R. Steinacher, F. Osman, J. Z. Dalgaard, A. Lorenz, M. C. Whitby, The DNA helicase Pfh1 promotes fork merging at replication termination sites to ensure genome stability. *Genes Dev.* **26**, 594–602 (2012). [Medline doi:10.1101/gad.184663.111](#)
42. S. Katayama, K. Kitamura, A. Lehmann, O. Nikaido, T. Toda, Fission yeast F-box protein Pof3 is required for genome integrity and telomere function. *Mol. Biol. Cell* **13**, 211–224 (2002). [Medline doi:10.1091/mbc.01-07-0333](#)
43. A. Franz, M. Orth, P. A. Pirson, R. Sonnevile, J. J. Blow, A. Gartner, O. Stemmann, T. Hoppe, CDC-48/p97 coordinates CDT-1 degradation with GINS chromatin dissociation to ensure faithful DNA replication. *Mol. Cell* **44**, 85–96 (2011). [Medline doi:10.1016/j.molcel.2011.08.028](#)
44. S. Priego Moreno, R. Bailey, N. Champion, S. Herron, A. Gambus, Polyubiquitylation drives replisome disassembly at the termination of DNA replication. *Science* **346**, 477–481 (2014).
45. P. Magnaghi, R. D'Alessio, B. Valsasina, N. Avanzi, S. Rizzi, D. Asa, F. Gasparri, L. Cozzi, U. Cucchi, C. Orrenius, P. Polucci, D. Ballinari, C. Perrera, A. Leone, G. Cervi, E. Casale, Y. Xiao, C. Wong, D. J. Anderson, A. Galvani, D. Donati, T. O'Brien, P. K. Jackson, A. Isacchi, Covalent and allosteric inhibitors of the ATPase VCP/p97 induce cancer cell death. *Nat. Chem. Biol.* **9**, 548–556 (2013). [Medline doi:10.1038/nchembio.1313](#)
46. M. Knop, K. Siegers, G. Pereira, W. Zachariae, B. Winsor, K. Nasmyth, E. Schiebel, Epitope tagging of yeast genes using a PCR-based strategy: More tags and improved practical routines. *Yeast* **15**, 963–972 (1999). [Medline doi:10.1002/\(SICI\)1097-0061\(199907\)15:10B<963::AID-YEA399>3.0.CO;2-W](#)
47. M. Kanemaki, K. Labib, Distinct roles for Sld3 and GINS during establishment and progression of eukaryotic DNA replication forks. *EMBO J.* **25**, 1753–1763 (2006). [Medline doi:10.1038/sj.emboj.7601063](#)
48. A. Sanchez-Diaz, M. Kanemaki, V. Marchesi, K. Labib, Rapid depletion of budding yeast proteins by fusion to a heat-inducible degron. *Sci. STKE* **2004**, pl8 (2004). [Medline](#)
49. R. S. Sikorski, P. Hieter, A system of shuttle vectors and yeast host strains designed for efficient manipulation of DNA in *Saccharomyces cerevisiae*. *Genetics* **122**, 19–27 (1989). [Medline](#)
50. K. Labib, J. F. X. Diffley, S. E. Kearsey, G1-phase and B-type cyclins exclude the DNA-replication factor Mcm4 from the nucleus. *Nat. Cell Biol.* **1**, 415–422 (1999). [Medline doi:10.1038/15649](#)
51. M. Foiani, F. Marini, D. Gamba, G. Lucchini, P. Plevani, The B subunit of the DNA polymerase  $\alpha$ -primase complex in *Saccharomyces cerevisiae* executes an essential function at the initial stage of DNA replication. *Mol. Cell. Biol.* **14**, 923–933 (1994). [Medline](#)

52. G. De Piccoli, Y. Katou, T. Itoh, R. Nakato, K. Shirahige, K. Labib, Replisome stability at defective DNA replication forks is independent of S phase checkpoint kinases. *Mol. Cell* **45**, 696–704 (2012). [Medline doi:10.1016/j.molcel.2012.01.007](#)
53. A. Gambus, F. van Deursen, D. Polychronopoulos, M. Foltman, R. C. Jones, R. D. Edmondson, A. Calzada, K. Labib, A key role for Ctf4 in coupling the MCM2-7 helicase to DNA polymerase  $\alpha$  within the eukaryotic replisome. *EMBO J.* **28**, 2992–3004 (2009). [Medline doi:10.1038/emboj.2009.226](#)
54. M. Foltman, C. Evrin, G. De Piccoli, R. C. Jones, R. D. Edmondson, Y. Katou, R. Nakato, K. Shirahige, K. Labib, Eukaryotic replisome components cooperate to process histones during chromosome replication. *Cell Reports* **3**, 892–904 (2013). [Medline doi:10.1016/j.celrep.2013.02.028](#)
55. P. Zegerman, J. F. Diffley, Checkpoint-dependent inhibition of DNA replication initiation by Sld3 and Dbf4 phosphorylation. *Nature* **467**, 474–478 (2010). [Medline doi:10.1038/nature09373](#)
